# Supplementary material
Source: ML conference proceedings conference paper supplement (https://proceedings.neurips.cc/paper_files/paper/2018/hash/32fdab6559cdfa4f167f8c31b9199643-Abstract.html)
Supplement: Supplementary file [file 32fdab6559cdfa4f167f8c31b9199643-Supplemental.zip]

## A Technical proofs

### A.1 Proof of Lemma 4.1.

*Proof.* Before we proceed with the main proof, we first introduce the following lemma in [7].

**Lemma A.1.** Let  $x_1, \dots, x_T$  be independent and identically drawn from distribution  $N(0, 1)$  and  $X = (x_1, \dots, x_T)^\top$  be a random vector. Suppose a function  $f : \mathbb{R}^T \rightarrow \mathbb{R}$  is Lipschitz, i.e., for any  $v_1, v_2 \in \mathbb{R}^T$ , there exists  $L$  such that  $|f(v_1) - f(v_2)| \leq L\|v_1 - v_2\|_2$ , then we have that

$$\mathbb{P}\left\{|f(X) - \mathbb{E}f(X)| > t\right\} \leq 2 \exp\left(-\frac{t^2}{2L^2}\right)$$

for all  $t > 0$ .

We then proceed with the proof of Lemma 4.1. For any fixed  $v \in \mathbb{R}^p$  with  $\|v\|_2 = 1$ , define

$$W = f_v(Z) = \frac{1}{\sqrt{m}} \left\| v^\top \text{mat}(\Sigma_{\text{col}}^{1/2} Z) \cdot A \right\|_2,$$

where  $Z \in \mathbb{R}^{pm \times 1}$  and  $\text{mat}(\cdot)$  is a reshape operator that reshape a  $pm$ -dimensional vector to a  $p \times m$  dimensional matrix. When  $Z \sim N(0, I_{pm})$ , it is straightforward to see that the distribution of  $\text{mat}(\Sigma_{\text{col}}^{1/2} Z)$  is the same as  $X$  and hence  $W^2$  has the same distribution with  $v^\top H v$ . We then verify that the function  $f_v$  is Lipschitz with  $L = \frac{\rho_0^2}{\sqrt{m}}$  where  $\rho_0$  is defined in assumption (SC). For any vector  $Z_1, Z_2$ , we have

$$\begin{aligned} |f_v(Z_1) - f_v(Z_2)| &= \frac{1}{\sqrt{m}} \left| \left\| v^\top \text{re}(\Sigma_{\text{col}}^{1/2} Z_1) \cdot A \right\|_2 - \left\| v^\top \text{re}(\Sigma_{\text{col}}^{1/2} Z_2) \cdot A \right\|_2 \right| \\ &\leq \frac{1}{\sqrt{m}} \left| v^\top \text{re}(\Sigma_{\text{col}}^{1/2} (Z_1 - Z_2)) \cdot A \right| \\ &\leq \frac{1}{\sqrt{m}} \|v\|_2 \left\| \Sigma_{\text{col}}^{1/2} (Z_1 - Z_2) \right\|_2 \cdot \|A\|_2 \\ &\leq \frac{1}{\sqrt{m}} \|\Sigma_{\text{col}}^{1/2}\|_2 \|Z_1 - Z_2\|_2 \cdot \|A\|_2 \\ &= \frac{\rho_0^2}{\sqrt{m}} \|Z_1 - Z_2\|_2. \end{aligned} \tag{A.1}$$

Using Lemma A.1, we have that

$$\mathbb{P}\left\{|W - \mathbb{E}W| > t\right\} \leq 2 \exp\left(-\frac{t^2 m}{2\rho_0^4}\right). \tag{A.2}$$

Since  $W \geq 0$  and hence  $\mathbb{E}W \geq 0$ , we have

$$\left[(\mathbb{E}W^2)^{1/2} - \mathbb{E}W\right]^2 \leq \left[(\mathbb{E}W^2)^{1/2} + \mathbb{E}W\right] \cdot \left[(\mathbb{E}W^2)^{1/2} - \mathbb{E}W\right] = \text{Var}(W).$$

Moreover, from (A.2) we have

$$\text{Var}(W) = \mathbb{E}\left\{(W - \mathbb{E}W)^2\right\} = \int_0^\infty \mathbb{P}\left\{(W - \mathbb{E}W)^2 \geq t^2\right\} d(t^2) \leq \int_0^\infty 2 \exp\left(-\frac{t^2 m}{2\rho_0^4}\right) d(t^2) = \frac{4\rho_0^4}{m},$$

and hence

$$(\mathbb{E}W^2)^{1/2} - \mathbb{E}W \leq \frac{2\rho_0^2}{\sqrt{m}}. \tag{A.3}$$

According to (A.3), we know that  $|W - \mathbb{E}W| \leq t$  implies  $|W - (\mathbb{E}W^2)^{1/2}| \leq t + 2\rho_0^2/\sqrt{m}$ , which gives

$$\mathbb{P}\left(|W - (\mathbb{E}W^2)^{1/2}| > t + 2\rho_0^2/\sqrt{m}\right) \leq \mathbb{P}\left(|W - \mathbb{E}W| > t\right) \leq 2 \exp\left(-\frac{t^2 m}{2\rho_0^4}\right) \tag{A.4}$$

for any fixed  $v \in \mathbb{R}^p$  with  $\|v\|_2 = 1$ . For large enough  $m$ , taking  $t = \frac{1}{4}c_{\min}$  and apply union bound on  $1/4$ -covering of  $\mathbb{S}^{m-1} = \{v \in \mathbb{R}^m \mid \|v\|_2 = 1\}$  we completes the proof. The proof for upper bound is similar.  $\square$

## A.2 Proof of Lemma 4.3.

*Proof.* Before we proceed with the main proof, we first introduce the following lemma in [14].

**Lemma A.2** (Lemma I.2 in [14]). Given a Gaussian random vector  $Y \sim N(0, S)$  with  $Y \in \mathbb{R}^{m \times 1}$ , for all  $t > 2/\sqrt{m}$  we have

$$\mathbb{P}\left[\frac{1}{m}\left|\|Y\|_2^2 - \text{tr } S\right| > 4t\|S\|_2\right] \leq 2\exp\left(-\frac{m\left(t - \frac{2}{\sqrt{m}}\right)^2}{2}\right) + 2\exp\left(-\frac{m}{2}\right). \quad (\text{A.5})$$

We then proceed with the proof of Lemma 4.3. Denote  $q_j = x_j - M^* \sum_{k \in c_j} x_k \sim N(0, \Sigma_j)$  and denote  $Q = [q_1, \dots, q_m] \in \mathbb{R}^{p \times m}$ , we have  $\mathbb{E} \frac{1}{m} Q Q^\top = G$  and

$$\frac{1}{m} \sum_{j=1}^m \left(x_j - M^* \sum_{k \in c_j} x_k\right) \cdot \sum_{k \in c_j} x_k^\top = \frac{1}{m} Q \cdot \tilde{X}. \quad (\text{A.6})$$

For any fixed  $v \in \mathbb{R}^p$  with  $\|v\|_2 = 1$ , we have

$$\begin{aligned} \frac{1}{m} v^\top Q \tilde{X} v &= \frac{1}{m} \sum_{j=1}^m v^\top q_j \cdot \tilde{x}_j^\top v = \frac{1}{2m} \left[ \sum_{j=1}^m \langle v, q_j + \tilde{x}_j \rangle^2 - \sum_{j=1}^m \langle v, q_j \rangle^2 - \sum_{j=1}^m \langle v, \tilde{x}_j \rangle^2 \right] \\ &= \underbrace{\frac{1}{2} v^\top \left( \frac{1}{m} \sum_{j=1}^m (q_j + \tilde{x}_j)(q_j + \tilde{x}_j)^\top \right) v - \frac{1}{2} v^\top \mathbb{E}(H + Q Q^\top) v}_{R_1} \\ &\quad - \underbrace{\left[ \frac{1}{2} v^\top \left( \frac{1}{m} \sum_{j=1}^m q_j q_j^\top \right) v - \frac{1}{2} v^\top \mathbb{E} Q Q^\top \cdot v \right]}_{R_2} - \underbrace{\left[ \frac{1}{2} v^\top \left( \frac{1}{m} \sum_{j=1}^m \tilde{x}_j \tilde{x}_j^\top \right) v - \frac{1}{2} v^\top \mathbb{E} H \cdot v \right]}_{R_3} \\ &= R_1 - R_2 - R_3. \end{aligned} \quad (\text{A.7})$$

Each  $R_j$  for  $j = 1, 2, 3$  is a deviation term and can be bounded similarly. For  $R_3$ , define the random vector  $Y \in \mathbb{R}^m$  with component  $Y_j = v^\top \tilde{x}_j$ . Using Lemma A.2 and together with assumption EC, we obtain

$$\mathbb{P}\left[|R_3| > 4t\sigma_{\max}\right] \leq 2\exp\left(-\frac{m\left(t - \frac{2}{\sqrt{m}}\right)^2}{2}\right) + 2\exp\left(-\frac{m}{2}\right). \quad (\text{A.8})$$

Similarly, for  $R_1$  and  $R_2$  we have

$$\mathbb{P}\left[|R_2| > 4t\eta_{\max}\right] \leq 2\exp\left(-\frac{m\left(t - \frac{2}{\sqrt{m}}\right)^2}{2}\right) + 2\exp\left(-\frac{m}{2}\right), \quad (\text{A.9})$$

and

$$\mathbb{P}\left[|R_1| > 4t(\sigma_{\max} + \eta_{\max})\right] \leq 2\exp\left(-\frac{m\left(t - \frac{2}{\sqrt{m}}\right)^2}{2}\right) + 2\exp\left(-\frac{m}{2}\right). \quad (\text{A.10})$$

Combine these three bounds, for fixed  $v \in \mathbb{R}^p$  with  $\|v\|_2 = 1$ , we have

$$\mathbb{P}\left[\frac{1}{m} \left|v^\top Q \tilde{X} v\right| > 8t(\sigma_{\max} + \eta_{\max})\right] \leq 6\exp\left(-\frac{m\left(t - \frac{2}{\sqrt{m}}\right)^2}{2}\right) + 6\exp\left(-\frac{m}{2}\right). \quad (\text{A.11})$$

Setting  $t = 4\sqrt{p/m}$  and taking the union bound on 1/4-covering of  $\mathbb{S}^{m-1} = \{v \in \mathbb{R}^m \mid \|v\|_2 = 1\}$  completes the proof.  $\square$

### A.3 Proof of Lemma 4.4.

*Proof.* Since  $M^{(0)}$  is the unconstrained minimizer of  $\mathcal{L}(M)$ , we have  $\mathcal{L}(M^{(0)}) \leq \mathcal{L}(M^*)$ . Since  $\mathcal{L}(\cdot)$  is strongly convex, we have

$$0 \geq \mathcal{L}(M^{(0)}) - \mathcal{L}(M^*) \geq \langle \nabla \mathcal{L}(M^*), M^{(0)} - M^* \rangle + \frac{\kappa_\mu}{2} \|M^{(0)} - M^*\|_F^2.$$

We then have

$$\|M^{(0)} - M^*\|_F^2 \leq -\frac{2}{\kappa_\mu} \langle \nabla \mathcal{L}(M^*), M^{(0)} - M^* \rangle \leq \frac{2}{\kappa_\mu} \|\nabla \mathcal{L}(M^*)\|_F \cdot \|M^{(0)} - M^*\|_F,$$

and hence

$$\|M^{(0)} - M^*\|_F \leq \frac{2}{\kappa_\mu} \|\nabla \mathcal{L}(M^*)\|_F \leq \frac{2\sqrt{p}\lambda}{\kappa_\mu}.$$

For large enough  $m$ , this error bound can be small and Lemma 2 in [28] gives

$$d^2(V^{(0)}, V^*) \leq \frac{2}{\sqrt{2}-1} \cdot \frac{\|M^{(0)} - M^*\|_F}{\sigma_r(M^*)} \leq \frac{20p\lambda^2}{\kappa_\mu^2 \cdot \sigma_r(M^*)}. \quad (\text{A.12})$$

□

### A.4 Proof of Theorem 4.5.

*Proof.* According to Lemma 4.3 and Lemma 4.4, the initialization  $M^{(0)}$  satisfies  $\|M^{(0)} - M^*\|_F \leq C$  as long as  $m \geq 4C_0p^2/\kappa_\mu^2$ . Furthermore, Lemma 4.1 shows that the objective function  $\mathcal{L}(\cdot)$  is strongly convex and smooth. Therefore we apply Lemma 3 in [28] and obtain

$$d^2(V^{(t+1)}, V^*) \leq \left(1 - \eta \cdot \frac{2}{5}\mu_{\min}\sigma_M\right) \cdot d^2(V^{(t)}, V^*) + \eta \cdot \frac{\kappa_L + \kappa_\mu}{\kappa_L \cdot \kappa_\mu} \cdot e_{\text{stat}}^2, \quad (\text{A.13})$$

where  $\mu_{\min} = \frac{1}{8} \frac{\kappa_\mu \kappa_L}{\kappa_\mu + \kappa_L}$  and  $\sigma_M = \|M^*\|_2$ . Define the contraction value

$$\beta = 1 - \eta \cdot \frac{2}{5}\mu_{\min}\sigma_M < 1, \quad (\text{A.14})$$

we can iteratively apply (A.13) for each  $t = 1, 2, \dots, T$  and obtain

$$d^2(V^{(T)}, V^*) \leq \beta^T d^2(V^{(0)}, V^*) + \frac{\eta}{1-\beta} \cdot \frac{\kappa_L + \kappa_\mu}{\kappa_L \cdot \kappa_\mu} \cdot e_{\text{stat}}^2, \quad (\text{A.15})$$

which shows linear convergence up to statistical error. For large enough  $T$ , the final error is given by

$$\begin{aligned} \frac{\eta}{1-\beta} \cdot \frac{\kappa_L + \kappa_\mu}{\kappa_L \cdot \kappa_\mu} \cdot e_{\text{stat}}^2 &= \frac{5}{2\mu_{\min}\sigma_M} \cdot \frac{\kappa_L + \kappa_\mu}{\kappa_L \cdot \kappa_\mu} \cdot e_{\text{stat}}^2 \\ &= \frac{20}{\sigma_M} \cdot \left(\frac{\kappa_L + \kappa_\mu}{\kappa_L \cdot \kappa_\mu}\right)^2 \cdot e_{\text{stat}}^2 \\ &\leq \frac{80}{\sigma_M} \cdot \frac{e_{\text{stat}}^2}{\kappa_\mu^2}. \end{aligned} \quad (\text{A.16})$$

Together with (4.6) we see that this gives exactly the same rate as the convex relaxation method (4.3). □
